# Supplementary material for: Corneal Culture in Infectious Keratitis: Effect of the Inoculation Method and Media on the Corneal Culture Outcome
Source: MDPI journal article supplement (doi:10.3390/jcm10091810), 2021-04-21
Supplement: s1 [file s1]

# Supplementary material

**Supplementary Table S1.** Microorganisms ( $n = 117$ ) isolated from corneal cultures of episodes of infectious keratitis ( $n = 94$ ) according to different culture methods.

|                                                     | Number of microorganisms isolated by standard method and indirect inoculation method (number of these isolated without enrichment in FAB) | Number of microorganisms isolated by standard method only (number of these isolated without enrichment in FAB) | Number of microorganisms isolated by indirect inoculation method only (number of these isolated without enrichment in FAB) | Number of culture negative readings by both standard method and indirect inoculation method (number found negative without enrichment in FAB) | Cohen's kappa [95% CI] for agreement between standard method and indirect inoculation method (agreement between both methods without enrichment in FAB) |
|-----------------------------------------------------|-------------------------------------------------------------------------------------------------------------------------------------------|----------------------------------------------------------------------------------------------------------------|----------------------------------------------------------------------------------------------------------------------------|-----------------------------------------------------------------------------------------------------------------------------------------------|---------------------------------------------------------------------------------------------------------------------------------------------------------|
| <i>Staphylococcus aureus</i> ( $n = 5$ )            | 0 (0)                                                                                                                                     | 5 (5)                                                                                                          | 0 (0)                                                                                                                      | 89 (89)                                                                                                                                       | 0 [nc <sup>a</sup> ]<br>(0 [nc <sup>a</sup> ])                                                                                                          |
| <i>Staphylococcus epidermidis</i> ( $n = 31$ )      | 6 (5)                                                                                                                                     | 18 (10)                                                                                                        | 7 (5)                                                                                                                      | 63 (74)                                                                                                                                       | 0.18 [0–0.40]<br>(0.31 [0.05–0.58])                                                                                                                     |
| Other coagulase-negative staphylococci ( $n = 10$ ) | 1 (1)                                                                                                                                     | 5 (4)                                                                                                          | 4 (4)                                                                                                                      | 84 (85)                                                                                                                                       | 0.13 [0–0.45]<br>(0.16 [0–0.50])                                                                                                                        |
| <i>Streptococcus pneumoniae</i> ( $n = 1$ )         | 1 (1)                                                                                                                                     | 0 (0)                                                                                                          | 0 (0)                                                                                                                      | 93 (93)                                                                                                                                       | 1 [1–1]<br>(1 [1–1])                                                                                                                                    |
| <i>Enterococcus faecalis</i> ( $n = 2$ )            | 1 (1)                                                                                                                                     | 1 (1)                                                                                                          | 0 (0)                                                                                                                      | 92 (92)                                                                                                                                       | 0.66 [0.04–1]<br>(0.66 [0.04–1])                                                                                                                        |
| <i>Corynebacterium</i> spp. ( $n = 24$ )            | 12 (12)                                                                                                                                   | 10 (10)                                                                                                        | 2 (2)                                                                                                                      | 70 (70)                                                                                                                                       | 0.59 [0.39–0.80]<br>(0.59 [0.39–0.80])                                                                                                                  |
| <i>Brachybacterium</i> spp. ( $n = 1$ )             | 0 (0)                                                                                                                                     | 1 (0)                                                                                                          | 0 (0)                                                                                                                      | 93                                                                                                                                            | 0 [0–0]                                                                                                                                                 |
| <i>Streptococcus mitis</i> ( $n = 1$ )              | 1 (1)                                                                                                                                     | 0 (0)                                                                                                          | 0 (0)                                                                                                                      | 93 (93)                                                                                                                                       | 1 [1–1]<br>(1 [1–1])                                                                                                                                    |
| <i>Micrococcus</i> spp. ( $n = 2$ )                 | 0 (0)                                                                                                                                     | 2 (2)                                                                                                          | 0 (0)                                                                                                                      | 92 (92)                                                                                                                                       | 0                                                                                                                                                       |
| <i>Enterobacter cloacae</i> ( $n = 1$ )             | 0 (0)                                                                                                                                     | 0 (0)                                                                                                          | 1 (1)                                                                                                                      | 93 (93)                                                                                                                                       | 0 [0–0]<br>(0 [0–0])                                                                                                                                    |
| <i>Pantoea</i> spp. ( $n = 2$ )                     | 0 (0)                                                                                                                                     | 1 (0)                                                                                                          | 1 (1)                                                                                                                      | 92 (93)                                                                                                                                       | <sup>b</sup><br>(0 [0–0])                                                                                                                               |
| <i>Pseudomonas aeruginosa</i> ( $n = 3$ )           | 2 (2)                                                                                                                                     | 1 (1)                                                                                                          | 0 (0)                                                                                                                      | 91 (91)                                                                                                                                       | 0.79 [0.39–1]<br>(0.79 [0.40–1])                                                                                                                        |
| <i>Moraxella</i> spp. ( $n = 2$ )                   | 1 (1)                                                                                                                                     | 0 (0)                                                                                                          | 1 (1)                                                                                                                      | 92 (92)                                                                                                                                       | 0.66 [0.04–1]<br>(0.66 [0.04–1])                                                                                                                        |
| <i>Haemophilus parainfluenzae</i> ( $n = 1$ )       | 1 (1)                                                                                                                                     | 0 (0)                                                                                                          | 0 (0)                                                                                                                      | 93 (93)                                                                                                                                       | 1 [1–1]<br>(1 [1–1])                                                                                                                                    |
| <i>Cutibacterium acnes</i> ( $n = 27$ )             | 4 (1)                                                                                                                                     | 13 (3)                                                                                                         | 10 (0)                                                                                                                     | 67 (90)                                                                                                                                       | 0.11 [0–0.34]<br>(0.39 [0–0.93])                                                                                                                        |
| <i>Cutibacterium avidum</i> ( $n = 1$ )             | 0 (0)                                                                                                                                     | 0 (0)                                                                                                          | 1 (0)                                                                                                                      | 93                                                                                                                                            | 0 [0–0]                                                                                                                                                 |
| <i>Staphylococcus saccharolyticus</i> ( $n = 1$ )   | 0 (0)                                                                                                                                     | 0 (0)                                                                                                          | 1 (1)                                                                                                                      | 93 (93)                                                                                                                                       | 0 [0–0]<br>(0 [0–0])                                                                                                                                    |
| <i>Veillonella parvula</i> ( $n = 1$ )              | 0 (0)                                                                                                                                     | 1 (0)                                                                                                          | 0 (0)                                                                                                                      | 93                                                                                                                                            | 0 [0–0]                                                                                                                                                 |
| <i>Candida albicans</i> ( $n = 1$ )                 | 0 (0)                                                                                                                                     | 1 (0)                                                                                                          | 0 (0)                                                                                                                      | 93                                                                                                                                            | 0 [0–0]                                                                                                                                                 |
| Total ( $n = 117$ )                                 | 30 (26)                                                                                                                                   | 59 (36)                                                                                                        | 28 (15)                                                                                                                    | 1669 (1333)                                                                                                                                   | 0.38 [0.28–0.49]<br>(0.49 [0.37–0.61])                                                                                                                  |
| Potentially pathogenic <sup>c</sup> ( $n = 22$ )    | 7 (7)                                                                                                                                     | 11 (7)                                                                                                         | 4 (3)                                                                                                                      | 1200 (829)                                                                                                                                    | 0.48 [0.25–0.70]<br>(0.58 [0.34–0.81])                                                                                                                  |
| Commensals <sup>d</sup> ( $n = 95$ )                | 23 (19)                                                                                                                                   | 48 (29)                                                                                                        | 24 (12)                                                                                                                    | 469 (504)                                                                                                                                     | 0.32 [0.20–0.44]<br>(0.44 [0.30–0.59])                                                                                                                  |

<sup>a</sup> nc: quantity could not be calculated. <sup>b</sup> Kappa not calculated because observed concordance was smaller than mean chance. <sup>c</sup> Potentially pathogenic<sup>1</sup>: *Staphylococcus aureus*, *Streptococcus pneumoniae*, *Enterococcus faecalis*, *Brachybacterium* spp., *Streptococcus mitis*, *Enterobacter cloacae*, *Pantoea* spp., *Pseudomonas aeruginosa*, *Moraxella* spp., *Haemophilus parainfluenzae*, *Cutibacterium avidum*, *Veillonella parvula*, *Candida albicans*. <sup>d</sup> Commensals<sup>1</sup>: Coagulase-negative staphylococci (CoNS), *Corynebacterium* spp., *Cutibacterium acnes*, *Micrococcus* spp.

## Reference

1. Fleiszig SM, Efron N. Microbial flora in eyes of current and former contact lens wearers. *J Clin Microbiol* **1992**; 30:1156–1161.
